# Supplementary material
Source: Springer Nature journal article supplement (https://www.springermedizin.de/resource/supplementary/13011_2011_171_MOESM3_ESM.pdf/9628548)

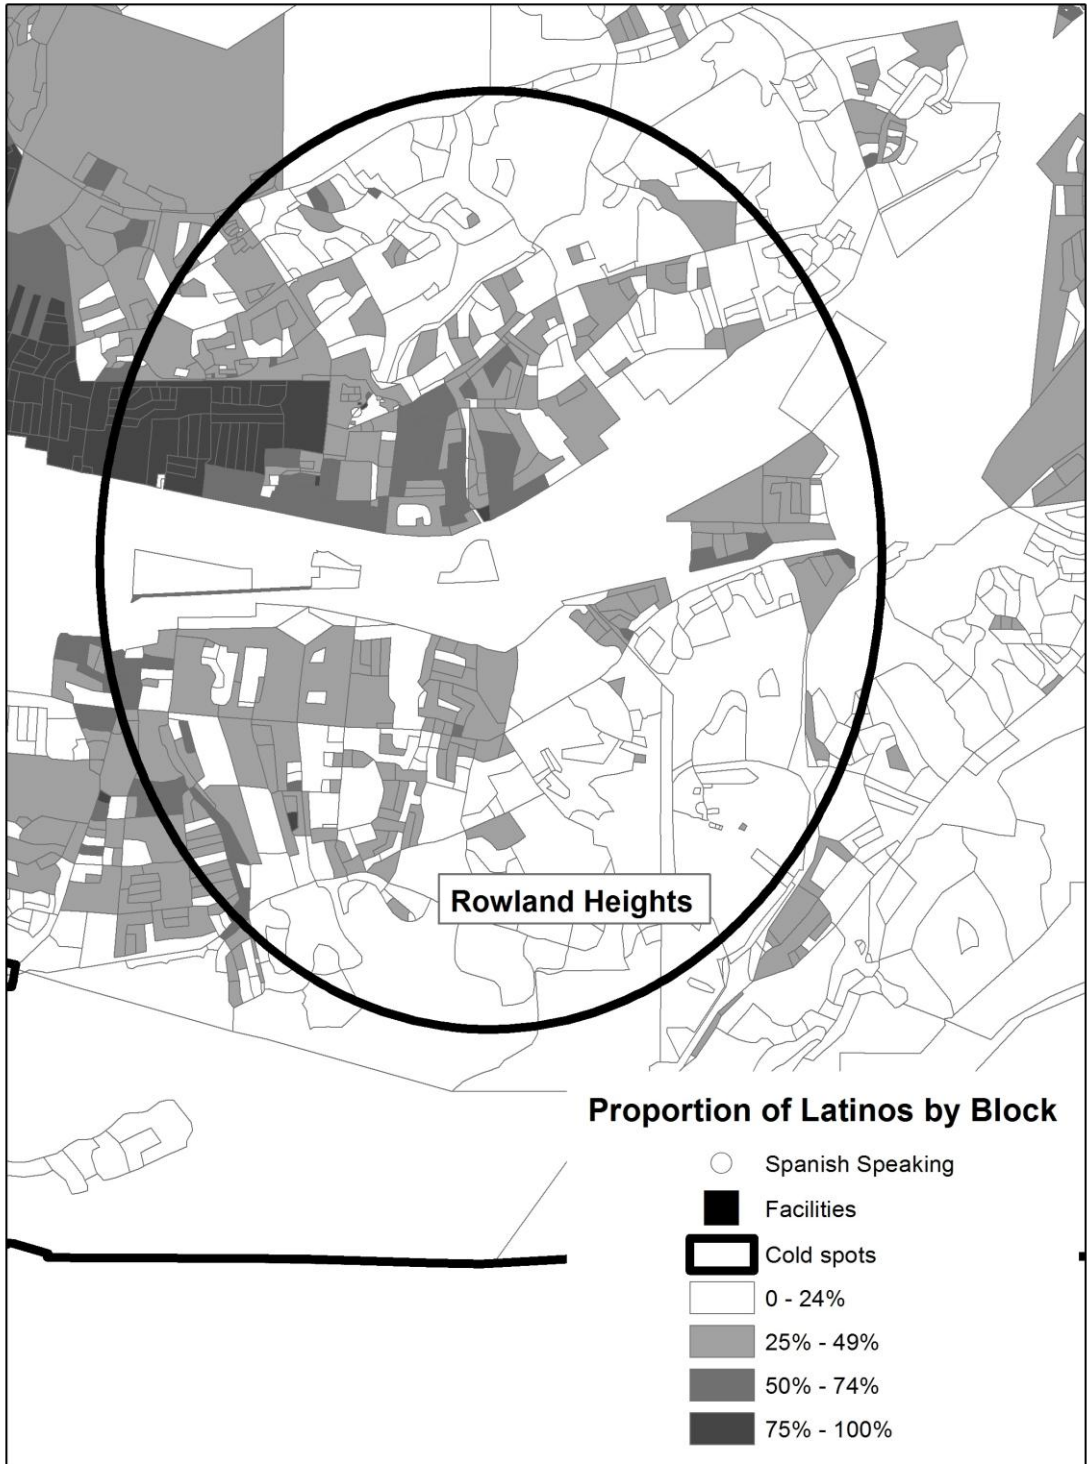

0 0.375 0.75 1.5 2.25 3  
 Kilometers

Supplement: MOESM3 [file 9628548]
